# Supplementary material for: Heterogeneous Environmental Regulation on the Impact Mechanism and Spatial Spillover Effects of the Synergistic Effect of Pollution Reduction and Carbon Emission Reduction
Source: Research Square preprint supplement (doi:10.21203/rs.3.rs-7928807/v1), 2025-11-14
Supplement: Supplementary file 1 [file 821e1cc028b492b04800b888.xlsx]

## Sheet: Sheet1
id	province	region	high	low	year	time	treat	did	x1 CO2（百万吨）	x2 SO2	x3 PM2.5	x4 氮氧化物	y1 排污费/环境税	y2工业治理完成投资额	c1 一般预算中对科学和技术的支出比例	c2 市场化	c3 FDI	c4 城镇化率	X2 环境法规	x5资本存量	x6能源消耗量	x7GDP（亿元）	第一产业	第二产业	第三产业	y3 环保投资总额 万元	X3 环境电话投诉数	X4环保工作人数	人均gdp
1	北京市	1	1	0	2011	0	1	0	94.7271	9.79	64.0816	1.9	0.3103	1.09	0.056412	7.83	466.3	0.862	2	24467.8	43.2045	16251.9	136.27	3752.48	12363.2	945100	12817	924	81658
1	北京市	1	1	0	2012	0	1	0	95.9374	28.69	42.0958	6.78	0.3146	37.39	0.0109159	8.31	502.6	0.863	2	27257.1	41.4364	17879.4	150.2	4059.27	13669.9	1135370	18706	933	87475
1	北京市	1	1	0	2013	0	1	0	86.6949	41.12	38.8933	6.25	2.4725	19.39	0.0134594	8.7	517.418	0.864	9	30184.1	36.7942	19800.8	161.83	4352.3	14986.4	1381672	23197	908	94647.9
1	北京市	1	1	0	2014	1	1	1	88.9773	21.58	50.7168	4.74	2.5611	5.21	0.056896	9.08	546.971	0.865	2	33072.2	31.6213	21330.8	158.99	4544.8	16627	2133553	1342	944	99995
1	北京市	1	1	0	2015	1	1	1	83.3863	4.33	22.2747	6.29	5.2926	17.55	0.05253	9.3	843.463	0.867	2	35954.1	21.103	23014.6	140.21	4542.64	18331.7	3032600	28918	966	106497
1	北京市	1	1	0	2016	1	1	1	74.9444	24.94	29.2008	3.71	5.9787	20.52	0.0259538	9.61	900.275	0.868	9	39788.7	15.4005	25669.1	129.79	4944.44	20594.9	3633800	20541	910	118198
1	北京市	1	1	0	2017	1	1	1	70.056	55.14	48.8505	6.14	4.4768	15.8	0.0256586	10.2896	1608.15	0.87	5	43357.9	8.94593	28014.9	120.42	5326.76	22567.8	4584403	15492	1067	128994
1	北京市	1	1	0	2018	1	1	1	71.8777	50.41	44.2308	8.1	4.4767	8.56	0.0143413	9.05444	1196.18	0.871	17	45825.3	4.05399	30320	118.69	5647.65	24553.6	3994452	664	1028.23	140211
1	北京市	1	1	0	2019	1	1	1	71.6409	6.75	27.1042	2.78	9.6006	4.02	0.0169332	9.10926	977.854	0.874	4	47697.1	2.69016	35371.3	113.69	5715.06	29542.5	3088057	877	1043.85	164220
1	北京市	1	1	0	2020	1	1	1	66.0691	26.01	24.3813	2.03	9.44	5.96	0.00935014	9.10926	935.122	0.875	9	49397.6	1.95244	36102.6	107.61	5716.37	30278.6	2369000	1698	1037.46	164889
1	北京市	1	1	0	2021	1	1	1	66.9881	15.43	13.5965	0.96	9.94651	7.5	0.00770993	9.7999	1322.11	0.875	7	51172.2	2.13138	40269.6	111.34	7268.6	32889.6	2492374	1403	1040.05	183980
1	北京市	1	1	0	2022	1	1	1	67.8022	29.5008	37.8995	4.56514	11.0129	7.82562	0.0227246	9.78169	1409.01	0.877164	7	52879.4	1.45093	41610.9	111.5	6605.1	34894.3	2228970	2217	1039	190313
2	天津市	1	1	0	2011	0	1	0	149.144	9.38	59.3442	1.97	1.9214	3.28	0.0542545	7.29	863.003	0.813	3	21753.6	87.1318	11307.3	159.72	5928.32	5219.24	322400	18995	979.5	85213
2	天津市	1	1	0	2012	0	1	0	143.137	16.17	36.4015	6.89	1.8697	12.93	0.0112781	8.87	938.5	0.836	3	26427	86.5365	12893.9	171.6	6663.82	6058.46	384869	16138	1012	93173
2	天津市	1	1	0	2013	0	1	0	151.032	34.9	38.0542	6.44	3.6012	13.05	0.01176	9.3	1021.52	0.856	1	31479.5	86.6768	14442	188.45	7276.68	6905.03	484370	14931	792	100105
2	天津市	1	1	0	2014	1	1	1	143.935	18.81	50.0422	5.04	5.5385	17.8	0.053274	9.17	1141.45	0.873	2	36620.1	82.2829	15726.9	199.9	7731.85	7795.18	579312	605	793	105231
2	天津市	1	1	0	2015	1	1	1	135.115	52.95	55.1615	10.05	5.307	9.28	0.0233213	9.19	1371.6	0.888	3	40567.1	74.4168	16538.2	208.82	7704.22	8625.15	731000	21021	905	107960
2	天津市	1	1	0	2016	1	1	1	130.352	22.71	29.9621	3.53	5.0594	20.12	0.0286402	9.38	697.91	0.898	1	43838.1	68.3214	17885.4	220.22	7571.35	10093.8	656300	17818	2438	115053
2	天津市	1	1	0	2017	1	1	1	132.145	21.78	42.1898	6.46	3.5768	36.91	0.0295984	10.3741	701.189	0.916	9	46449.8	63.5272	18549.2	168.96	7593.59	10786.6	1102158	13837	918	118944
2	天津市	1	1	0	2018	1	1	1	138.357	47.2	42.5772	8.26	3.5769	18.32	0.016941	9.57444	335.207	0.938	10	48058.4	62.7055	18809.6	172.71	7609.81	11027.1	664557	13349	920.8	120711
2	天津市	1	1	0	2019	1	1	1	137.717	5.06	27.6441	2.77	4.3005	2.07	0.0191602	9.61926	325.535	0.843	2	50241.6	60.3353	14104.3	185.23	4969.18	8949.87	2422857	217	922.9	90370.6
2	天津市	1	1	0	2020	1	1	1	128.493	24.74	23.1162	1.98	3.12	9.87	0.00904425	9.61926	313.93	0.847	1	52258.7	59.3613	14083.7	210.18	4804.08	9069.47	607200	510	924.48	101614
2	天津市	1	1	0	2021	1	1	1	141.008	15.08	12.2953	0.83	4.50543	4.93	0.00740516	10.2848	282.369	0.849	6	54314.6	60.3148	15695	225.413	5854.27	9615.37	471350	241	925.66	113732
2	天津市	1	1	0	2022	1	1	1	138.372	24.6837	37.963	4.93745	4.29522	14.4456	0.0211063	10.1836	111.461	0.887527	3	55243.8	58.1139	16311.3	273.1	6038.9	9999.3	290568	218	926.55	119235
3	河北省	1	1	0	2011	0	0	0	623.458	8.7	60.46	2.05	16.6539	4.28	0.0562275	5.3	309.411	0.456	7	41583.3	526.681	24515.8	2905.73	13126.9	8483.17	1054800	18354	2051	33969
3	河北省	1	1	0	2012	0	0	0	642.307	17.07	35.3334	6.28	16.6499	9.55	0.01273	5.58	362.804	0.466	17	48133.3	548.044	26575	3186.66	14003.6	9384.78	1279295	11141	2181	36584
3	河北省	1	1	0	2013	0	0	0	657.72	32.12	33.0408	6.87	15.1087	6.92	0.0140594	5.77	391.345	0.48	11	54771.9	568.505	28443	3500.42	14762.1	10038.9	1718643	11026	2456	38909
3	河北省	1	1	0	2014	0	0	0	624.586	17.08	49.8712	2.75	16.3757	21.18	0.0439065	6.19	385.504	0.494	7	61319.2	540.732	29421.2	3447.46	15012.9	10960.8	1934322	1856	2202	39984
3	河北省	1	1	0	2015	1	0	0	639.367	51.96	50.4718	10.33	16.8701	12.74	0.0242362	5.95	400.92	0.517	7	67580.8	546.783	29806.1	3439.45	14386.9	11979.8	2827200	17215	2381	40255
3	河北省	1	1	0	2016	1	0	0	614.569	10.25	24.4491	3.43	25.4114	9.3	0.0293284	6.04	508.153	0.539	6	74213.6	517.806	32070.5	3492.81	15256.9	13320.7	2628000	14835	1627	43062
3	河北省	1	1	0	2017	1	0	0	541.903	17.37	39.907	6.98	17.5714	17.46	0.0344453	7.12852	561.157	0.557	21	79549	447.78	34016.3	3129.98	15846.2	15040.1	3534535	25649	2529	45387
3	河北省	1	1	0	2018	1	0	0	595.289	46.66	42.9809	8.39	17.5716	17.9	0.0172209	6.33222	627.504	0.573	22	84427.9	487.304	36010.3	3338	16040.1	16632.2	4335468	2184	2422	47772.2
3	河北省	1	1	0	2019	1	0	0	593.43	90.2	29.7493	13.47	27.3145	16.65	0.00978626	6.3363	677.68	0.588	2	89234.1	463.26	35104.5	3518.44	13597.3	17988.8	5024972	2297	2484	46347.9
3	河北省	1	1	0	2020	1	0	0	589.565	23.58	23.0309	1.96	24.49	11.93	0.00871526	6.3363	719.406	0.601	4	93665.1	458.243	36206.9	3880.14	13597.2	18729.5	5092700	2202	2524	48564
3	河北省	1	1	0	2021	1	0	0	579.359	5.62	11.9567	0.71	25.0557	9.62	0.00714848	6.77425	751.358	0.611	3	97891.8	444.835	40391.3	4030.34	16364.2	19996.7	3516498	2468	2500	54172
3	河北省	1	1	0	2022	1	0	0	582.787	28.5459	36.4573	5.74624	26.5846	14.7326	0.020507	6.83306	804.818	0.634927	10	102524	449.268	42370.4	4410.3	17050.1	20910	3186318	1475	2679	56995
4	山西省	2	0	1	2011	0	0	0	766.117	7.89	68.7039	2.13	12.6524	7.6	0.0624823	4.7	137.011	0.498	5	19115.8	747.291	11237.5	641.42	6635.26	3960.87	821800	16838	1165	31357
4	山西省	2	0	1	2012	0	0	0	854.67	139.91	56.8505	5.37	15.1279	27.95	0.011494	4.89	156.487	0.513	12	22192.5	831.83	12112.8	698.32	6731.56	4682.95	881725	29737	1419	33628
4	山西省	2	0	1	2013	0	0	0	1499.06	26.31	33.5254	7.4	11.4505	12.15	0.0128856	5.08	170.365	0.529	11	25598	1474.49	12665.2	773.81	6792.68	5035.75	981575	7622	1479	34983.8
4	山西省	2	0	1	2014	0	0	0	1552.01	6.5	42.4948	2.98	9.4039	51.95	0.0493876	5.27	178.588	0.543	7	28737.9	1527.12	12761.5	788.89	6293.91	5678.69	952555	348	1478	35070
4	山西省	2	0	1	2015	1	0	0	1474.5	50.13	56.5877	10.61	11.1079	41.32	0.0252133	5.4	186.253	0.559	5	31644.8	1449.52	12766.5	783.16	5194.27	6789.06	994600	6206	1600	34918.7
4	山西省	2	0	1	2016	1	0	0	1433.11	8.75	23.9094	3.28	11.3466	8.73	0.0311188	5.57	161.17	0.573	7	33922.6	1405.44	13050.4	784.78	5028.99	7236.64	1155400	5547	1059	35532
4	山西省	2	0	1	2017	1	0	0	1521.41	12.08	36.0737	7.13	11.2948	13.74	0.0369907	5.84	111.741	0.586	19	34532.1	1492.03	15528.4	719.16	6778.89	8030.37	1288667	7725	1629	42060
4	山西省	2	0	1	2018	1	0	0	1650.13	42.12	36.1701	4.74	11.295	24.72	0.0122076	5.52333	163.194	0.599	10	35124.5	1618.22	16818.1	740.64	7089.19	8988.28	1702941	3272	1722	45328
4	山西省	2	0	1	2019	1	0	0	1698.44	86.44	28.8948	13.7	14.1789	11.06	0.0108967	5.53778	93.502	0.613	0	35875	1660.87	17026.7	824.72	7453.09	8748.87	2261475	1850	1790	45724
4	山西省	2	0	1	2020	1	0	0	1924.95	17.66	21.8107	1.94	12.6	14.23	0.0093117	5.53778	112.085	0.625	4	36887.5	1884.98	17651.9	946.68	7675.44	9029.81	2602800	1532	1800	50527.9
4	山西省	2	0	1	2021	1	0	0	2099.79	5.03	11.1759	0.69	11.9798	1.53	0.00779862	5.87393	116.15	0.634	4	38166	2057.08	22590.2	1286.87	11213.1	10090.2	2147856	1608	1899	64821
4	山西省	2	0	1	2022	1	0	0	2247.73	6.70953	33.9054	5.30454	12.1151	7.91574	0.0251117	5.92024	101.119	0.653036	2	39502.4	2207.95	25642.6	1340.4	13840.8	10461.3	2411817	1500	1962	73675
5	内蒙古自治区	3	0	1	2011	0	0	0	740.516	7.12	60.4841	1.21	9.8363	10	0.0501595	4.68	253.71	0.57	3	27656.7	711.806	14359.9	1306.3	8037.69	5015.89	1175500	5291	1014	57974
5	内蒙古自治区	3	0	1	2012	0	0	0	788.692	130.18	51.7284	5.53	10.0501	32.33	0.0120744	5.34	246.449	0.584	4	33389.3	758.623	15880.6	1448.58	8801.5	5630.5	1315865	7230	1069	63886
5	内蒙古自治区	3	0	1	2013	0	0	0	783.743	20.64	33.2951	9.09	8.789	9.8	0.0120898	5.33	281.925	0.598	2	40113.3	743.69	16916.5	1599.41	9084.19	6148.78	1321085	7733	1078	67835.6
5	内蒙古自治区	3	0	1	2014	0	0	0	806	1.38	38.0465	3.35	7.0695	44.82	0.0516583	5.1	240.638	0.61	4	44873.5	765.137	17770.2	1627.85	9119.79	7022.55	1427534	3263	1094	71046.4
5	内蒙古自治区	3	0	1	2015	1	0	0	753.8	49.3	56.3203	10.98	9.7562	17.6	0.0277841	5.34	218.472	0.621	2	49570	715.909	17831.5	1617.42	9000.58	7213.51	1752500	6562	1468	71100.5
5	内蒙古自治区	3	0	1	2016	1	0	0	754.615	182.74	67.079	15.5	9.7836	62.45	0.021715	5.43	274.1	0.634	9	52854.4	714.823	18128.1	1637.39	8553.63	7937.08	1593900	6772	1179	72064
5	内蒙古自治区	3	0	1	2017	1	0	0	765.073	11.68	38.3465	7.4	8.6806	13.39	0.0400598	5.16556	208.183	0.646	15	54076.3	716.942	16096.2	1649.77	6399.68	8046.76	1436651	10054	1240	63764
5	内蒙古自治区	3	0	1	2018	1	0	0	857.573	13.79	32.3077	4.8	8.6811	13.04	0.0101763	4.83556	218.265	0.655	11	53004.3	827.592	17289.2	1753.82	6807.3	8728.1	1627228	9696	1237	68302
5	内蒙古自治区	3	0	1	2019	1	0	0	972.787	81.67	29.0151	14.07	16.337	18.84	0.0111737	4.83407	141.728	0.665	1	52288.5	937.23	17212.5	1863.19	6818.88	8530.46	1544824	8400	1462	67852.1
5	内蒙古自治区	3	0	1	2020	1	0	0	1046.66	17.31	23.9522	1.81	19.76	7.15	0.00932194	4.83407	212.16	0.675	2	51481.2	1004.68	17359.8	2025.12	6868.03	8466.66	1493700	1015	1427	72062.4
5	内蒙古自治区	3	0	1	2021	1	0	0	1034.09	4.65	12.1305	0.7	15.4624	2.31	0.00776743	4.94425	180.662	0.682	2	51196.7	989.185	20514.2	2225.23	9374.19	8914.77	1438673	1515	1549	85422
5	内蒙古自治区	3	0	1	2022	1	0	0	1058.07	20.9805	36.0502	6.2461	17.0209	4.86906	0.0217272	4.77733	167.541	0.698545	1	51774.9	1013.25	23158.6	2653.7	11241.8	9263.1	1415623	1675	1497	96474
6	辽宁省	1	0	1	2011	0	0	0	524.469	1.5	54.5663	1.3	12.8649	9.88	0.0446059	6.44	1604.07	0.641	2	39297.2	298.448	22226.7	1915.57	12152.1	8158.98	742000	19922	3145	50760
6	辽宁省	1	0	1	2012	0	0	0	543.274	125.54	50.1481	5.69	14.1254	55.56	0.0204814	6.65	1674.57	0.659	3	45744.9	300.761	24846.4	2155.82	13230.5	9460.12	932663	13023	2909	56649
6	辽宁省	1	0	1	2013	0	0	0	529.863	16.33	31.235	6.48	12.5907	12.08	0.0133431	6.7	1762.73	0.668	2	52508	304.776	27213.2	2321.63	14269.5	10486.6	1085925	21206	3223	61996.2
6	辽宁省	1	0	1	2014	0	0	0	520.807	1.11	35.4901	3.4	8.715	8.08	0.0510523	7	1659.11	0.676	0	58886.1	298.467	28626.6	2285.75	14384.6	11956.2	1060954	3155	2980	65201.2
6	辽宁省	1	0	1	2015	1	0	0	502.371	48.01	49.8525	4.43	10.3343	17.95	0.0282382	7.24	336.517	0.68	5	61290.3	281.073	28669	2384.03	13042	13243	1167900	24621	2975	65354.4
6	辽宁省	1	0	1	2016	1	0	0	508.943	174.88	65.7935	16.15	8.7534	67.06	0.021166	7.57	207.232	0.682	15	61342	270.796	22246.9	2173.06	8606.54	11467.3	872400	28874	3182	50791
6	辽宁省	1	0	1	2017	1	0	0	515.648	9.72	30.6309	7.76	3.8504	19.81	0.0340938	7.58741	352.649	0.684	31	61459.4	272.638	23409.2	1902.28	9199.8	12307.2	1065333	28648	3278	53526.7
6	辽宁省	1	0	1	2018	1	0	0	560.658	10.52	33.6786	5.58	4.4885	7.58	0.0122316	6.72444	338.294	0.692	38	61577.1	281.694	25315.3	2033.3	10025.1	13257	942119	4635	3372	58007.5
6	辽宁省	1	0	1	2019	1	0	0	628.028	79.64	25.6811	14.37	5.875	23.2	0.0120301	6.74593	228.617	0.693	4	61495.8	295.142	24909.5	2177.77	9531.24	13200.4	1297274	2959	3276	57191
6	辽宁省	1	0	1	2020	1	0	0	646.132	91.68	46.7178	5.82	5.95	23.72	0.00989829	6.74593	166.752	0.722	4	61436.4	299.292	25115	2284.61	9400.91	13429.4	979400	4109	3297	58872.4
6	辽宁省	1	0	1	2021	1	0	0	649.707	4.32	10.0543	0.69	2.86567	3.89	0.00556296	7.12835	295.875	0.728	9	61482.6	298.652	27584.1	2461.76	10875.2	14247.1	803924	3988	3338	65026
6	辽宁省	1	0	1	2022	1	0	0	613.714	51.9739	39.5644	6.52605	1.60608	18.5233	0.0209965	7.0701	461.738	0.727618	6	61630.1	286.233	28975.1	2597.6	11755.8	14621.7	752066	4216	3449	68775
7	吉林省	2	0	1	2011	0	0	0	264.669	0.65	46.7368	1.19	3.3578	15.67	0.0530085	5.64	97.9106	0.534	9	25085.3	216.829	10568.8	1277.44	5611.48	3679.91	1024200	12743	983	38460
7	吉林省	2	0	1	2012	0	0	0	265.304	120.82	46.1125	5.91	3.4413	31.1	0.0175879	6.15	103.041	0.545	5	29174.3	221.059	11939.2	1412.11	6376.77	4150.36	1138468	11625	1076	43415
7	吉林省	2	0	1	2013	0	0	0	237.289	41.32	39.7408	5.31	3.2494	6.56	0.00961966	6.23	110.443	0.557	3	33197.6	191.546	13046.4	1509.34	6858.23	4613.89	1268326	12814	977	47428
7	吉林省	2	0	1	2014	0	0	0	234.969	0.75	33.7631	3.45	3.0464	29.94	0.0476255	6.42	118.969	0.568	6	37224.6	188.678	13803.1	1524.01	7286.59	4992.54	1403017	1215	989	50160
7	吉林省	2	0	1	2015	1	0	0	218.852	27.2	45.5441	4.68	3.6622	41.55	0.0469858	6.4	138.073	0.576	7	41474.7	175.145	14063.1	1596.28	7005.71	5461.14	1177000	11485	1009	51086
7	吉林省	2	0	1	2016	1	0	0	214.183	164.5	68.8072	16.86	2.8975	84.35	0.0222966	6.52	157.133	0.587	9	44743.1	169.205	14776.8	1498.52	7004.95	6273.33	1221400	5093	979	53868
7	吉林省	2	0	1	2017	1	0	0	214.517	9.21	29.9826	7.48	1.345	13.85	0.0396501	7.06556	369.336	0.597	8	47176.6	167.954	14944.5	1095.36	6998.51	6850.66	1151197	5556	966	54838
7	吉林省	2	0	1	2018	1	0	0	193.872	10.06	30.3136	6.1	1.3448	5.83	0.0121327	6.55	30.48	0.609	23	49132.9	154.379	15074.6	1160.75	6410.85	7503.02	1207852	2758	980	55610.9
7	吉林省	2	0	1	2019	1	0	0	197.765	71.76	23.9387	6.06	1.558	11.83	0.0128963	6.57667	36.7812	0.616	6	49568.9	153.459	11726.8	1287.32	4134.82	6304.68	1479673	1593	991	43475
7	吉林省	2	0	1	2020	1	0	0	184.394	84.38	43.255	5.96	1.48	27.13	0.0105106	6.57667	37.5258	0.626	0	50298.6	147.343	12311.3	1553	4326.22	6432.1	1315300	804	990	50799.8
7	吉林省	2	0	1	2021	1	0	0	190.884	4.01	9.8039	0.69	1.0224	0.29	0.00546346	6.91533	103.758	0.634	1	51585.3	150.996	13235.5	1553.84	4768.28	6913.4	1122708	1422	1025	55450
7	吉林省	2	0	1	2022	1	0	0	185.164	46.991	37.7097	5.73637	0.634613	19.0415	0.0229742	6.91021	93.8352	0.646491	4	52431.3	142.315	13070.2	1689.1	4628.3	6752.8	1060688	1579	998	55347
8	黑龙江省	2	0	1	2011	0	0	0	381.24	0.27	42.7276	1.24	4.3321	1.94	0.0569999	5.02	214.825	0.565	2	19763.8	298.025	12582	1701.5	6330.53	4549.97	922700	9620	1309	32819
8	黑龙江省	2	0	1	2012	0	0	0	393.331	112.06	43.3834	4.15	4.6884	27.87	0.0109466	6.01	243.75	0.569	2	23089.5	311.818	13691.6	2113.66	6037.61	5540.31	1048634	12007	1319	35711
8	黑龙江省	2	0	1	2013	0	0	0	363.482	40.35	38.0206	5.47	3.4776	5.73	0.0101013	6.2	279.827	0.58	4	26977.3	280.524	14454.9	2516.79	5918.22	5947.92	1157524	5850	1292	37697
8	黑龙江省	2	0	1	2014	0	0	0	350.354	0.54	29.2328	3.37	3.4609	9.07	0.0501351	6.22	307.945	0.592	2	30533.4	267.786	15039.4	2611.36	5544.41	6883.61	1115668	11564	1316	39226.3
8	黑龙江省	2	0	1	2015	1	0	0	347.805	19.54	46.9115	4.77	4.2836	25.9	0.0419763	6.53	353.705	0.605	3	34031.9	267.021	15083.7	2633.5	4798.08	7652.09	1555200	15628	1317	39461.6
8	黑龙江省	2	0	1	2016	1	0	0	365.374	159.02	62.2474	17.29	3.7646	141.6	0.0204892	6.8	402.162	0.611	6	36823	279.4	15386.1	2670.46	4400.69	8314.94	1134400	10917	1363	40432
8	黑龙江省	2	0	1	2017	1	0	0	355.326	68.55	55.2061	15.44	1.6962	9.7	0.0119179	7.03111	386.024	0.619	14	39438.2	281.556	15902.7	2965.25	4060.6	8876.83	1932040	10346	1385	41916
8	黑龙江省	2	0	1	2018	1	0	0	338.788	9.51	28.6826	7.1	1.6962	4.86	0.0123615	6.08	405.635	0.635	16	41251.8	275.743	16361.6	3000.96	4030.94	9329.72	1540926	2022	1440	43274.4
8	黑龙江省	2	0	1	2019	1	0	0	341.14	30.79	23.3068	5.95	2.3279	11.6	0.0126222	6.10667	37.3749	0.646	4	43201.4	277.859	13612.7	3182.45	3615.21	6815.03	2110589	2246	1476	36182.8
8	黑龙江省	2	0	1	2020	1	0	0	336.889	80.62	41.3948	6.19	2.27	41.76	0.0103727	6.10667	36.0897	0.656	5	45019.5	269.07	13698.5	3438.29	3483.51	6776.7	2202700	2169	1448	42634.6
8	黑龙江省	2	0	1	2021	1	0	0	358.511	4.08	10.0221	0.53	1.53967	1.18	0.00657085	6.62911	195.35	0.657	10	47016.2	288.226	14879.2	3462.97	3975.29	7440.93	1405411	2358	1428	47266
8	黑龙江省	2	0	1	2022	1	0	0	354.377	44.9473	37.7361	6.35988	1.17759	27.5422	0.0193403	6.47913	152.954	0.6726	3	48705.6	285.435	15901	3609.8	4648.9	7642.2	1591477	1923	1541	51096
9	上海市	1	1	0	2011	0	1	0	170.603	0.19	38.8886	1.31	1.8961	0.73	0.0585051	8.83	832.926	0.89	2	30116.6	91.3101	19195.7	124.94	7927.89	11142.9	516200	56681	1185	82560
9	上海市	1	1	0	2012	0	1	0	168.521	49.59	43.3878	4.07	2.2421	30.07	0.0100792	8.67	949.062	0.886	6	32106.6	84.9462	20181.7	127.8	7854.77	12199.1	551842	28696	1353	85373
9	上海市	1	1	0	2013	0	1	0	181.783	38.15	39.7871	5.63	1.7619	9.37	0.0135613	8.89	1018.55	0.884	5	34323.2	85.5919	21818.2	129.28	8027.77	13445.1	564273	32779	1275	90993
9	上海市	1	1	0	2014	1	1	1	156.547	0.58	27.3625	3.1	2.3831	11.09	0.0501375	9.77	1099.04	0.881	4	36572	71.9916	23567.7	124.26	8167.71	15275.7	773187	3249	1278	97370
9	上海市	1	1	0	2015	1	1	1	161.647	16.27	40.7342	5.48	3.5225	19.9	0.0448582	9.85	1197.99	0.861	4	39515.1	66.877	25123.5	109.82	7991	17022.6	1043500	37681	1360	103796
9	上海市	1	1	0	2016	1	1	1	158.225	152.57	69.3958	6.65	6.5184	94.59	0.0192788	10.22	1279.32	0.862	6	43428.8	66.0334	28178.7	109.47	8406.28	19662.9	1344100	30055	1406	116562
9	上海市	1	1	0	2017	1	1	1	156.578	64.5	54.4426	15.77	1.8078	17.96	0.0117001	11.1093	1124.23	0.86	5	47032.5	64.4292	30633	110.78	9330.67	21191.5	2246599	25709	1486	126634
9	上海市	1	1	0	2018	1	1	1	151.474	8.78	24.6292	8.94	1.8078	3.55	0.0107226	9.82333	1195.44	0.863	16	50209.4	61.6374	32679.9	104.37	9732.54	22843	2333920	2279	1464.8	134982
9	上海市	1	1	0	2019	1	1	1	159.497	22.32	21.9628	6.19	2.2502	12.69	0.0122573	9.85444	1310.5	0.864	2	53342.2	58.7284	38155.3	103.88	10299.2	27752.3	1840737	1992	1480.52	157279
9	上海市	1	1	0	2020	1	1	1	154.627	78.1	38.5245	6.34	1.95	33.4	0.0113219	9.85444	1341.45	0.893	5	56861.9	57.691	38700.6	103.57	10289.5	28307.5	1818800	1742	1468.82	155768
9	上海市	1	1	0	2021	1	1	1	161.294	41.04	42.9751	1.66	2.68203	3.87	0.0111487	10.5727	1406.45	0.8655	10	60625.2	70.1426	43214.8	99.97	11449.3	31665.6	1593010	3526	1477.51	173630
9	上海市	1	1	0	2022	1	1	1	216.456	2.61951	30.0514	5.17805	2.51781	4.88331	0.0245997	10.6983	1434.58	0.863145	3	63634.8	68.0522	44652.8	97	11458.4	33097.4	2038126	1626	1471.05	179907
10	江苏省	1	1	0	2011	0	0	0	613.108	0.18	32.4924	1.37	19.0582	0.51	0.0577501	9.18	2123.91	0.62	11	71324.8	458.177	49110.3	3064.77	25203.3	20842.2	1703700	59981	1734	62290
10	江苏省	1	1	0	2012	0	0	0	619.989	34.12	44.2991	4.19	19.9967	51.52	0.0133758	9.95	2234.97	0.63	10	81232.7	456.497	54058.2	3418.29	27122	23518	1938259	59235	1945	68347
10	江苏省	1	1	0	2013	0	0	0	638.441	37.23	42.8678	5.82	18.4006	16.4	0.0125111	9.88	2018.83	0.644	13	90831.7	455.661	59753.4	3646.08	29094	26421.6	2291832	72919	2042	75354
10	江苏省	1	1	0	2014	0	0	0	621.071	105.38	57.1714	14.25	17.094	31.01	0.0342992	9.63	1704.54	0.657	18	99893.8	430.244	65088.3	3634.33	30854.5	30599.5	2377844	5486	2243	81874
10	江苏省	1	1	0	2015	1	0	0	634.161	15.1	42.119	5.92	22.338	27.05	0.0511281	9.76	1575.12	0.675	16	109500	429.784	70116.4	3986.05	32044.5	34085.9	3084500	57396	2175	87995
10	江苏省	1	1	0	2016	1	0	0	653.117	72.98	61.5844	6.73	24.8151	126.41	0.0190744	9.58	1695.71	0.689	11	119910	439.138	77388.3	4077.18	34619.5	38691.6	2851100	58407	2287	96887
10	江苏省	1	1	0	2017	1	0	0	645.049	64.13	50.2813	16.13	21.5222	23.37	0.0118229	9.67111	1661.45	0.702	12	130285	426.395	85869.8	4045.16	38654.9	43169.7	2921045	63009	2351	107150
10	江苏省	1	1	0	2018	1	0	0	644.965	7.43	25.9063	7.39	21.5221	11.96	0.0122497	9.32	1768.44	0.712	33	139411	419.995	92595.4	4141.72	41248.5	47205.2	3179875	11068	2402	115168
10	江苏省	1	1	0	2019	1	0	0	636.582	19.17	20.0115	5.97	35.8893	16.31	0.0152362	9.32667	1797.35	0.725	9	148415	404.455	99631.5	4296.28	44270.5	51064.7	3727726	8165	2343	123607
10	江苏省	1	1	0	2020	1	0	0	628.063	73.5	36.196	3.23	35.24	27.99	0.0130894	9.32667	1881.85	0.734	3	155911	402.314	102719	4536.72	44226.4	53955.8	3369000	3890	2449	121231
10	江苏省	1	1	0	2021	1	0	0	669.221	40.66	40.4543	1.71	33.1961	6.92	0.0111162	9.36578	1629.47	0.739	24	163568	438.261	116364	4722.42	51775.4	59866.4	3367963	9387	2457	137039
10	江苏省	1	1	0	2022	1	0	0	671.966	46.5026	42.2781	6.79434	35.8316	36.5524	0.0193824	9.18513	1616.82	0.760145	9	170773	443.218	122876	4959.4	55888.7	62027.5	2792016	8360	2567	144390
11	浙江省	1	1	0	2011	0	0	0	398.623	0.14	34.0478	1.71	8.6262	0.64	0.0623787	8.38	771.123	0.611	14	48369.4	263.553	32318.8	1583.04	16555.6	14180.2	781100	49807	1085	59249
11	浙江省	1	1	0	2012	0	0	0	383.593	28.19	39.1489	4.45	7.4605	38.72	0.0137922	9.33	816.829	0.609	9	53598.9	255.781	34665.3	1667.88	17316.3	15681.1	776980	45787	1035	63374
11	浙江省	1	1	0	2013	0	0	0	387.561	36.29	44.6903	2.97	9.4477	12.12	0.0128656	9.44	859.45	0.608	11	59359.8	251.605	37756.6	1784.62	18446.7	17337.2	981384	59419	1065	68804.7
11	浙江省	1	1	0	2014	0	0	0	380.795	99.2	54.1729	14.74	8.2643	39.01	0.0366035	9.78	955.734	0.607	16	65037	244.272	40173	1777.18	19175.1	19220.8	1206530	9663	1172	73002.1
11	浙江省	1	1	0	2015	1	0	0	381.501	10.86	35.0309	5.3	9.3095	24.35	0.049505	10.11	1100.72	0.609	11	71309.3	244.273	42886.5	1832.91	19711.7	21341.9	1678900	67233	1238	77643.7
11	浙江省	1	1	0	2016	1	0	0	379.177	41.63	54.2126	7.04	8.0909	113.1	0.0211453	10.46	1214.6	0.617	12	78783.8	247.632	47251.4	1965.18	21194.6	24091.6	1614000	55782	1186	84916
11	浙江省	1	1	0	2017	1	0	0	401.441	62.37	51.671	16.5	2.2244	17.3	0.0118349	10.923	1183.33	0.623	9	85428.2	253.78	51768.3	1933.92	22232.1	27602.3	1901502	51454	1225	92057
11	浙江省	1	1	0	2018	1	0	0	401.659	3.26	25.6701	2.29	2.6376	2.75	0.012622	9.95667	1287.94	0.63	14	91546.7	252.881	56197.2	1967.01	23505.9	30724.3	1947519	8511	1306	98643.4
11	浙江省	1	1	0	2019	1	0	0	419.147	18.82	19.0995	6.6	3.5102	12.33	0.0178723	9.94222	932.873	0.642	6	98192.6	243.202	62351.7	2097.38	26566.6	33687.8	2695485	4852	1363	107624
11	浙江省	1	1	0	2020	1	0	0	454.555	25.02	35.625	3.19	3.35	19.49	0.0141273	9.94222	1046.53	0.72	4	104615	231.066	64613.3	2169.23	26413	36031.2	2205900	5888	1452	100620
11	浙江省	1	1	0	2021	1	0	0	526.009	38.97	40.638	1.74	2.00791	16.55	0.0115836	10.65	1224.58	0.727	13	111909	276.386	73515.8	2209.09	31188.6	40118.1	2035597	6347	1437	113032
11	浙江省	1	1	0	2022	1	0	0	568.895	25.5776	37.1259	5.45184	0.916636	10.7717	0.0194676	10.5937	1242.11	0.701327	7	119670	286.571	77715.4	2324.8	33205.2	42185.4	2231550	6896	1498	118496
12	安徽省	2	1	0	2011	0	0	0	315.387	23.09	79.238	2.45	5.6879	15.28	0.0334961	6.53	438.177	0.448	3	21746.8	268.388	15300.6	2015.31	8309.38	4975.95	819600	13145	1490	25659
12	安徽省	2	1	0	2012	0	0	0	355.907	22.86	38.3019	4.24	5.4315	42.6	0.0122522	6.36	539.882	0.466	9	25357.4	305.622	17212.1	2178.73	9404.84	5628.48	955189	13776	1508	28792
12	安徽省	2	1	0	2013	0	0	0	387.18	14.4	33.8635	2.86	5.6721	9.84	0.0114359	6.61	648.883	0.482	3	29289.6	328.703	19229.3	2348.09	10404	6286.82	1084246	13397	1457	32000.9
12	安徽省	2	1	0	2014	0	0	0	401.795	94.17	60.6765	15.31	5.301	59.38	0.0388013	7.46	746.57	0.499	6	33447.3	333.552	20848.7	2392.39	11077.7	7378.68	1047646	1725	1537	34424.6
12	安徽省	2	1	0	2015	1	0	0	392.848	8.55	32.9261	4.86	5.6198	16.53	0.0548129	7.26	883.902	0.516	9	37656.3	325.716	22005.6	2456.69	10946.8	8602.11	1248300	18119	1541	35996.6
12	安徽省	2	1	0	2016	1	0	0	380.177	34.13	48.0622	7.67	6.3507	67.51	0.0230413	7.46	1020.41	0.534	5	42352.8	315.635	24407.6	2567.72	11821.6	10018.3	1336400	15507	1555	39561
12	安徽省	2	1	0	2017	1	0	0	397.016	59.55	44.2744	7.53	2.9543	26.14	0.0115663	8.78333	1050.76	0.552	20	46741.3	325.364	27018	2582.27	12838.3	11597.5	1986403	20853	1555	43401.4
12	安徽省	2	1	0	2018	1	0	0	392.429	3.41	20.081	2.26	2.9551	4.83	0.013231	7.07556	1174.81	0.569	31	51160.8	320.002	30006.8	2638.01	13842.1	13526.7	2093185	8131	1595	47711.7
12	安徽省	2	1	0	2019	1	0	0	398.962	16.31	17.2804	6.65	3.7229	24.44	0.0162253	7.10741	1234.27	0.583	7	55739.6	325.221	37114	2915.7	15337.9	18860.4	3121150	5125	1619	58495.6
12	安徽省	2	1	0	2020	1	0	0	397.171	18.58	35.2346	3.17	3.22	17.23	0.0164148	7.10741	1213.95	0.583	8	60054.6	319.748	38680.6	3184.68	15671.7	19824.3	1908300	6729	1584	63426.5
12	安徽省	2	1	0	2021	1	0	0	415.064	37.71	37.9654	1.8	2.88935	27.3	0.0116582	7.73958	1412.54	0.594	16	64774.9	330.474	42959.2	3360.59	17613.2	21985.4	1994541	7855	1648	70321
12	安徽省	2	1	0	2022	1	0	0	388.814	31.0859	41.0035	5.3631	2.43417	30.5812	0.0209545	7.79317	1497.63	0.621109	18	69753.4	350.565	45045	3513.7	18588	22943.3	2006851	11515	1639	73603
13	福建省	1	0	1	2011	0	1	0	210.152	22.45	73.5902	2.47	3.4095	12.56	0.0356721	6.84	409.893	0.581	4	29242.5	152.576	17560.2	1612.24	9069.2	6878.74	379500	26220	865	47377
13	福建省	1	0	1	2012	0	1	0	208.529	16.05	34.1328	4.26	3.3691	28.49	0.0129313	7.27	396.109	0.593	10	33986.8	145.385	19701.8	1776.71	10187.9	7737.13	485982	27913	892	52763
13	福建省	1	0	1	2013	0	1	0	203.571	12.27	34.445	3.03	3.2094	9.07	0.0125733	7.44	405.413	0.608	3	39292.2	140.811	21868.5	1936.31	11315.3	8508.03	586029	23708	819	58145
13	福建省	1	0	1	2014	0	1	0	229.155	90.47	60.0125	15.72	3.8067	48.5	0.0386076	8.07	430.457	0.62	2	45027.2	142.326	24055.8	2014.8	12515.4	9525.6	617958	9934	905	63472
13	福建省	1	0	1	2015	0	1	0	234.475	38.92	32.4536	8.93	4.388	14.26	0.0184152	7.98	498.652	0.632	15	51170.9	135.508	25979.8	2118.1	13064.8	10796.9	955700	26232	928	67965.5
13	福建省	1	0	1	2016	0	1	0	217.152	28.15	50.6201	8.32	4.4431	95.43	0.0284695	8.2	566.25	0.644	7	57766.1	118.893	28810.6	2363.22	14093.5	12353.9	1303500	33965	932	74707
13	福建省	1	0	1	2017	1	1	1	232.919	30.92	39.6019	8.4	2.2164	12.7	0.0112696	9.36444	566.921	0.658	26	64521	133.504	32182.1	2215.13	15354.3	14612.7	1206481	34518	894	82677
13	福建省	1	0	1	2018	1	1	1	254.145	3.24	23.1181	2.25	2.3433	3.51	0.0136723	8.94778	307.825	0.67	32	71359	151.364	35804	2379.82	17232.4	16191.9	1240388	5134	938	91197.2
13	福建省	1	0	1	2019	1	1	1	275.973	13.58	18.0105	6.73	3.1889	8.1	0.0243516	8.9437	317.136	0.679	11	78050.5	155.426	42395	2596.23	20581.7	19217	1795465	3758	940	107139
13	福建省	1	0	1	2020	1	1	1	281.649	14.72	32.1366	2.58	3.14	16.78	0.0164495	8.9437	333.056	0.687	12	83639.4	161.608	43903.9	2732.32	20328.8	20842.8	1564200	4628	992	105818
13	福建省	1	0	1	2021	1	1	1	314.539	35.76	38.4194	1.29	2.927	10.43	0.0151516	9.60968	381.328	0.697	8	89360.1	181.704	48810.4	2897.74	22866.3	23046.3	1399660	878	1068	116939
13	福建省	1	0	1	2022	1	1	1	296.006	25.7877	38.9437	5.76344	2.77271	9.01405	0.0185055	9.81091	361.05	0.713273	9	95272	173.54	53109.9	3076.2	25078.2	24955.5	1226221	6379	1063	126829
14	江西省	2	0	1	2011	0	0	0	144.748	21.68	82.0656	2.54	8.4307	14.84	0.0364069	5.87	400.487	0.457	2	17287.7	110.491	11702.8	1391.07	6390.55	3921.2	437600	12534	951	26150
14	江西省	2	0	1	2012	0	0	0	146.46	14.7	33.0149	4.2	8.408	7.61	0.0165227	5.74	426.519	0.474	6	19634.5	106.971	12948.9	1520.23	6942.59	4486.06	669129	12697	935	28800
14	江西省	2	0	1	2013	0	0	0	162.189	8.96	26.9291	3.05	8.5803	2.83	0.0108453	5.9	458.343	0.49	12	22024.4	116.796	14410.2	1636.49	7671.38	5030.63	741652	11097	944	31930
14	江西省	2	0	1	2014	0	0	0	165.471	83.51	55.4935	6.3	8.3618	62.17	0.0383956	6.79	511.286	0.505	5	24216.6	119.38	15714.6	1683.72	8247.93	5782.98	681277	5104	991	34674
14	江西省	2	0	1	2015	1	0	0	170.406	37.13	32.0114	9.09	7.7582	23.76	0.0185885	6.53	614.603	0.523	2	26894.5	122.232	16723.8	1772.98	8411.57	6539.23	874300	18186	1073	36724
14	江西省	2	0	1	2016	1	0	0	176.672	19.33	44.5177	8.43	8.4375	51.95	0.0265829	6.69	721.404	0.54	6	30194.6	122.702	18499	1904.53	8829.54	7764.93	1178800	23841	1248	40400
14	江西省	2	0	1	2017	1	0	0	179.011	27.59	37.9924	8.47	2.3651	8.61	0.0133089	8.09852	757.753	0.557	11	33236.2	127.114	20006.3	1835.26	9627.98	8543.07	1434042	27648	1131	43424.4
14	江西省	2	0	1	2018	1	0	0	183.4	3.26	21.9366	2.27	2.3641	5.6	0.012302	6.90889	868.702	0.573	10	36225	128.639	21984.8	1877.33	10250.2	9857.24	1625457	4412	1143	47433.9
14	江西省	2	0	1	2019	1	0	0	186.177	110.43	40.4422	3.8	3.2396	13.2	0.00963813	6.93852	934.239	0.591	4	39326.5	128.514	24757.5	2057.56	10939.8	11760.1	1942833	3419	1237	53164
14	江西省	2	0	1	2020	1	0	0	183.173	14.33	31.5942	2.65	3.51	29.46	0.0124831	6.93852	967.98	0.604	6	42474.1	127.548	25691.5	2241.59	11084.8	12365.1	2182700	5352	1254	56871.1
14	江西省	2	0	1	2021	1	0	0	189.237	19.65	37.7185	0.81	1.8503	24.21	0.0145551	7.54499	1051.45	0.615	5	46008.5	128.416	29619.7	2334.29	13183.2	14102.2	2295946	8642	1282	65560
14	江西省	2	0	1	2022	1	0	0	161.578	29.0086	39.8597	4.69132	0.741587	21.9291	0.016963	7.70135	1134.73	0.636255	4	49685.4	132.503	32074.7	2451.5	14359.6	15263.7	2376336	5453	1271	70923
15	山东省	1	0	1	2011	0	0	0	976.557	20.92	85.6525	2.64	14.7638	22.1	0.0377844	7.02	737.691	0.508	8	75456.4	742.639	45361.8	3973.85	24017.1	17370.9	1139500	34950	2108	47335
15	山东省	1	0	1	2012	0	0	0	1007.56	140.94	26.8414	4.93	15.8321	31.02	0.00943728	7.41	772.042	0.523	6	85847.7	755.56	50013.2	4281.7	25735.7	19995.8	1544192	27989	2128	51768
15	山东省	1	0	1	2013	0	0	0	944.494	9.84	28.9244	3.61	14.4588	6.78	0.0099614	7.55	853.026	0.537	21	96717.9	675.002	55230.3	4742.63	27422.5	22519.2	2128095	33324	2313	56884.9
15	山东省	1	0	1	2014	0	0	0	997.831	57.8	49.5237	6.53	13.5649	74.78	0.0381709	7.93	919.304	0.549	8	107993	693.853	59426.6	4798.36	28788.1	25840.1	1666733	4317	2307	60879.1
15	山东省	1	0	1	2015	1	0	0	1052.18	36.1	29.5186	9.32	15.9245	38.4	0.0197546	7.89	1057.93	0.569	11	119667	726.029	63002.3	4979.08	29485.9	28537.4	2170800	27784	2355	64168.3
15	山东省	1	0	1	2016	1	0	0	1096.72	16.53	40.3265	8.09	21.2579	37.69	0.0317864	8.04	1162.65	0.589	19	130504	715.803	68024.5	4929.13	31343.7	31751.7	2392800	26474	2474	68733
15	山东省	1	0	1	2017	1	0	0	1101.8	22.94	32.7636	9.15	14.0345	7.05	0.0173727	8.82704	1180.37	0.604	24	139619	676.426	72634.1	4832.71	32942.8	34858.6	2368370	24788	2597	72807.1
15	山东省	1	0	1	2018	1	0	0	1220.03	3.23	19.3981	0.77	14.7071	1.32	0.00998846	7.88	1417.68	0.61	38	147293	749.822	76469.7	4950.52	33641.7	37877.4	2871972	22338	2945	76267.3
15	山东省	1	0	1	2019	1	0	0	1244.71	104.11	42.3388	3.83	19.3865	12.47	0.0105176	7.89	1010.63	0.613	7	151668	739.766	71067.5	5116.44	28310.9	37640.2	3064956	8383	2725	70652.6
15	山东省	1	0	1	2020	1	0	0	1273.77	9.37	28.0133	2.61	13.41	19.5	0.00951888	7.89	1170.04	0.631	5	155723	724.504	73129	5363.76	28612.2	39153.1	2915400	3768	2718	72151.4
15	山东省	1	0	1	2021	1	0	0	1267.57	14.81	35.3454	0.78	16.4234	8.56	0.0186139	8.35541	1337.21	0.63691	19	160315	708.16	83095.9	6029.03	33187.2	43879.7	2667867	4386	2691	81727
15	山东省	1	0	1	2022	1	0	0	1205.3	34.2684	38.1011	4.75059	16.4404	16.4539	0.0177074	8.34777	1383.39	0.658804	20	165340	705.274	87435.1	6298.6	35014.2	46122.3	2180950	4880	2770	86003
16	河南省	2	0	1	2011	0	0	0	654.1	18.59	72.1057	1.98	10.439	24.01	0.0373784	6.34	666.486	0.405	17	51322.4	575.18	26931	3512.24	15427.1	7991.72	956000	5844	2489	28661
16	河南省	2	0	1	2012	0	0	0	545.869	138.49	25.7566	5.12	9.5414	18.97	0.0080577	6.48	757.361	0.42	22	60747.8	457.359	29599.3	3769.54	16672.2	9157.57	1094525	8053	2935	31499
16	河南省	2	0	1	2013	0	0	0	594.416	6.84	28.115	3.6	8.1577	0.81	0.00967733	6.67	816.84	0.436	18	71038.3	499.075	32191.3	4058.98	17806.4	10290.5	1119228	5975	2767	34211.5
16	河南省	2	0	1	2014	0	0	0	557.527	38.32	47.5933	7	7.8961	44.8	0.0402983	7	903.083	0.45	15	81786	465.688	34938.2	4160.01	17816.6	12961.7	1199451	2593	3412	37071.7
16	河南省	2	0	1	2015	1	0	0	537.066	35.6	31.1506	9.54	8.6912	42.4	0.0203815	7.03	1043.98	0.47	16	92571.4	446.842	37002.2	4209.56	17917.4	14875.2	1777700	31035	3298	39122.6
16	河南省	2	0	1	2016	1	0	0	536.839	137.05	73.4057	13.9	7.5118	21.37	0.013319	7.19	1174.22	0.488	14	103679	451.342	40471.8	4286.21	19275.8	16909.8	1957200	26133	3796	42575
16	河南省	2	0	1	2017	1	0	0	557.621	19.13	34.7747	10.05	10.3101	5.48	0.021398	7.73222	1138.51	0.506	32	112653	473.328	44552.8	4139.29	21105.5	19308	2416484	17826	3359	46674
16	河南省	2	0	1	2018	1	0	0	498.134	1.34	19.6933	0.81	10.3099	1.61	0.0113986	7.05	1237.03	0.522	33	121164	419.447	48055.9	4289.38	22034.8	21731.7	3587008	4073	3161	50152.2
16	河南省	2	0	1	2019	1	0	0	463.998	98.64	38.9457	3.87	10.6662	19.56	0.011117	7.05	1288.42	0.54	5	129713	387.477	54259.2	4635.4	23605.8	26018	3522869	3261	3271	56387.8
16	河南省	2	0	1	2020	1	0	0	464.564	8.11	26.3222	2.52	9.04	6.44	0.0153237	7.05	1330.31	0.554	3	137643	382.313	54997.1	5353.74	22875.3	26768	2726300	4344	3115	55435
16	河南省	2	0	1	2021	1	0	0	474.743	13.06	33.804	0.79	9.65988	7.91	0.0239741	7.44711	1456.6	0.565	9	145495	389.858	58887.4	5620.82	24331.6	28934.9	2104065	5804	3318	59410
16	河南省	2	0	1	2022	1	0	0	487.359	50.5736	39.6623	5.42003	10.1367	14.674	0.0174442	7.47714	1526.55	0.586618	12	153661	425.941	61345.1	5817.8	25465	30062.2	1831855	3661	3346	62106
17	湖北省	2	0	1	2011	0	1	0	321.881	2.67	68.0573	1.2	4.0146	10.36	0.0338376	5.83	307.697	0.518	10	29896.1	257.357	19632.3	2569.3	9815.94	7247.02	1011100	17004	1702	34197
17	湖北省	2	0	1	2012	0	1	0	311.388	135.87	26.3081	5.27	4.0554	62.67	0.00858179	6.32	354.119	0.532	20	34857.6	245.795	22250.5	2848.77	11193.1	8208.58	956340	18147	1697	38572
17	湖北省	2	0	1	2013	0	1	0	252.921	6.23	25.1921	3.16	4.2401	3.94	0.0103965	6.71	418.13	0.545	19	40346.7	177.752	24791.8	3098.16	12171.6	9398.77	1097196	20382	1745	42825.8
17	湖北省	2	0	1	2014	0	1	0	251.824	31.68	45.7656	7.46	5.1642	81.17	0.0435182	7.28	479.639	0.557	19	46313.2	170.59	27379.2	3176.89	12852.4	11349.9	1037752	4817	2241	47144.6
17	湖北省	2	0	1	2015	1	1	1	252.877	33.79	26.9675	2.98	5.9723	44.69	0.0191424	7.3	580.726	0.572	13	52578	171.123	29550.2	3309.84	13503.6	12736.8	1458400	27993	2206	50653.8
17	湖北省	2	0	1	2016	1	1	1	253.984	127.59	69.147	14.42	7.6231	14.83	0.01391	7.59	699.906	0.586	8	59333.8	172.559	32665.4	3659.33	14654.4	14351.7	1456400	29411	2069	55665
17	湖北省	2	0	1	2017	1	1	1	266.934	10.24	28.6065	10.08	4.3894	3.35	0.0262593	8.75593	726.698	0.599	25	65973.7	179.494	35478.1	3528.96	15441.8	16507.4	1397121	26170	1894	60199
17	湖北省	2	0	1	2018	1	1	1	258.016	0.97	19.9402	0.86	4.3903	3.43	0.00863735	7.38222	825.12	0.61	16	72428.3	169.024	39366.6	3547.51	17089	18730.1	2112988	10991	1838	66615.7
17	湖北省	2	0	1	2019	1	1	1	282.362	92.58	39.9243	3.98	7.7148	18.5	0.0125148	7.39296	888.033	0.618	12	79057.2	182.842	45828.3	3809.09	19098.6	22920.6	2821321	6010	1688	77386.5
17	湖北省	2	0	1	2020	1	1	1	242.449	62.39	36.1263	3.81	5.84	10.53	0.00738036	7.39296	686.33	0.632	23	81910	157.75	43443.5	4131.91	17023.9	22287.7	2191800	5672	1738	74440.5
17	湖北省	2	0	1	2021	1	1	1	286.951	12.5	29.3855	0.99	6.74448	6.23	0.0217331	8.18395	931.32	0.641	17	86758.1	182.956	50012.9	4661.67	18952.9	26398.4	1671023	5141	1722	86416
17	湖北省	2	0	1	2022	1	1	1	294.375	52.0401	38.2099	4.97535	6.95255	32.2248	0.017161	8.21526	988.141	0.657291	9	92821.8	197.735	53734.9	4986.7	21240.6	27507.6	1692226	6654	1716	92059
18	湖南省	2	0	1	2011	0	0	0	269.56	2.51	60.2304	1.43	6.0083	7.83	0.0353346	5.74	406.535	0.45	2	27292.4	215.64	19669.6	2768.03	9361.99	7539.54	852600	12067	1435	29880
18	湖南省	2	0	1	2012	0	0	0	275.301	131.24	28.5738	5.39	5.7008	77.5	0.00847048	5.73	455.021	0.462	3	32051.9	212.242	22154.2	3004.21	10506.4	8643.6	1094342	10050	1671	33480
18	湖南省	2	0	1	2013	0	0	0	266.327	52.19	28.3567	8.49	5.5605	10.09	0.011893	5.87	528.383	0.476	5	37200.4	200.103	24621.7	3099.23	11517.4	9885.09	1286696	427	2552	36943
18	湖南省	2	0	1	2014	0	0	0	255.969	28.46	44.5446	8.31	5.2132	59.99	0.0454953	6.79	621.084	0.49	1	42641.1	190.855	27037.3	3148.75	12482.1	11406.5	1374932	3831	1637	40270.5
18	湖南省	2	0	1	2015	1	0	0	250.516	24.16	25.4879	3.01	4.9299	22.63	0.0187772	6.56	750.53	0.508	2	47413.4	188.255	28902.2	3331.62	12810.8	12759.8	1490000	17872	1677	42753.9
18	湖南省	2	0	1	2016	1	0	0	265.505	125.4	73.8447	14.98	5.2102	43.97	0.0143317	6.76	888.079	0.527	1	52493.3	198.138	31551.4	3578.37	13341.2	14631.8	1708500	16896	1773	46382
18	湖南省	2	0	1	2017	1	0	0	275.968	8.49	28.6531	9.39	3.1284	10.56	0.0261002	8.19	956.791	0.546	15	56864.8	211.987	33903	2998.4	14145.5	16759.1	1732822	14802	1838	49558
18	湖南省	2	0	1	2018	1	0	0	243.246	0.81	17.4309	0.84	3.1324	0.36	0.00889314	7.04667	1118.82	0.561	13	61259.6	175.699	36425.8	3083.59	14453.5	18888.7	1908937	6976	1839	52948.6
18	湖南省	2	0	1	2019	1	0	0	242.062	85.3	34.3018	1.65	4.5453	10.7	0.0148953	7.03222	1245.37	0.574	3	66050.4	170.272	39752.1	3646.95	14947	21158.2	2426823	4178	1860	57540.3
18	湖南省	2	0	1	2020	1	0	0	227.634	57.25	33.376	3.92	4.17	21.1	0.0078587	7.03222	1392.16	0.588	8	70912.3	157.827	41781.5	4240.45	15937.7	21603.4	2455800	5168	1932	62900.2
18	湖南省	2	0	1	2021	1	0	0	218.027	7.16	28.2434	1.69	3.33497	6.05	0.0188535	7.70941	1452.94	0.597	4	76144.3	150.706	46063.1	4322.92	18126.1	23614.1	1946204	4440	1940	69440
18	湖南省	2	0	1	2022	1	0	0	216.23	22.7329	33.7575	4.97112	3.09791	3.86023	0.0200763	7.87376	1585.01	0.6188	10	81416	148.805	48670.4	4602.7	19182.6	24885.1	1665518	4708	2104	73598
19	广东省	1	1	0	2011	0	1	0	501.362	1.9	52.7472	1.49	8.7351	7.24	0.0343788	7.91	2293.17	0.666	4	66195.4	313.179	53210.3	2665.2	26447.4	24097.7	2326200	75755	3136	50807
19	广东省	1	1	0	2012	0	1	0	486.696	123.09	29.5254	4.06	9.2938	43.89	0.00839886	8.37	2187.14	0.671	5	75655.1	298.218	57067.9	2847.26	27701	26519.7	2354391	77663	2546	54095
19	广东省	1	1	0	2013	0	1	0	493.088	51.43	28.129	8.77	8.5635	3.93	0.0118688	8.69	2204.23	0.681	6	86064.6	290.381	62474.8	3047.51	29427.5	29689	3077778	104659	2664	58833
19	广东省	1	1	0	2014	1	1	1	500.648	11.26	38.1245	8.49	7.1211	53.13	0.0427137	9.35	2605.07	0.686	11	97218.8	290.098	67809.9	3166.82	31419.8	33223.3	2590367	3725	2855	63469
19	广东省	1	1	0	2015	1	1	1	497.946	11.95	26.0817	3	7.8255	14.74	0.0212293	9.35	3641.54	0.695	4	108341	281.134	72812.6	3345.54	32613.5	36853.5	3223300	23221	2874	67503
19	广东省	1	1	0	2016	1	1	1	506.863	119.82	61.817	15.38	7.6721	55.5	0.013477	9.65	5989.23	0.701	6	121170	280.775	80854.9	3694.37	35109.7	42050.9	2974500	105942	3026	74016
19	广东省	1	1	0	2017	1	1	1	533.198	84.77	40.8713	20.82	4.6366	16.64	0.0303796	10.8589	4831.03	0.707	31	134952	297.649	89705.2	3611.44	38008.1	48085.7	4332336	115392	3092	80932
19	广东省	1	1	0	2018	1	1	1	557.278	0.69	16.0774	0.76	5.0229	0.63	0.0161959	9.71778	10025.6	0.718	17	148370	296.111	97277.8	3831.44	40695.2	52751.2	5674059	25272	3029	86412
19	广东省	1	1	0	2019	1	1	1	552.289	35.37	32.4748	1.71	6.5737	5.69	0.0162586	9.73037	10471.4	0.727	11	162186	292.394	107671	4351.26	43546.4	59773.4	7474388	13279	3233	94172
19	广东省	1	1	0	2020	1	1	1	575.148	56.2	38.0811	4.1	6.29	18.21	0.00855469	9.73037	10742.5	0.742	28	175836	285.593	110761	4769.99	43450.2	62540.8	5177600	14894	3331	88210
19	广东省	1	1	0	2021	1	1	1	669.617	6.03	29.197	0.74	4.96155	6.54	0.0203074	10.5315	11571.3	0.746	26	189705	348.348	124370	5003.66	50219.2	69146.8	4935502	12142	3470	98285
19	广东省	1	1	0	2022	1	1	1	659.072	9.87895	31.8185	5.30337	4.49324	9.9307	0.022582	10.6295	13145.3	0.752618	17	200497	341.989	129119	5340.4	52843.5	70934.7	4648870	16296	4465	101905
20	广西壮族自治区	3	0	1	2011	0	0	0	173.337	1.78	51.0164	1.5	2.6996	12.59	0.0309174	5.3	67.0128	0.419	1	24215.4	114.712	11720.9	2047.23	5675.32	3998.33	539000	15750	982	25326
20	广西壮族自治区	3	0	1	2012	0	0	0	192.853	56.95	25.8808	3.39	2.7562	40.62	0.00717529	6.19	46.7831	0.435	8	29495.6	117.935	13035.1	2172.37	6247.43	4615.3	600090	16607	1058	27952
20	广西壮族自治区	3	0	1	2013	0	0	0	189.775	48.91	28.1278	9.28	2.3481	20.7	0.0114611	6.34	42.4949	0.451	5	33571.7	117.328	14449.9	2343.57	6863.04	5171.39	642258	15008	1015	30741.2
20	广西壮族自治区	3	0	1	2014	0	0	0	183.5	8.86	35.7285	7.3	2.2695	9.82	0.0460458	6.51	60.572	0.465	10	37631.4	107.812	15672.9	2413.44	7324.96	5934.49	839981	21222	1050	33089.6
20	广西壮族自治区	3	0	1	2015	1	0	0	173.226	10.85	23.5328	2.98	3.6256	16.42	0.0238488	6.54	111.758	0.48	5	41940.2	95.1974	16803.1	2565.45	7717.52	6520.15	986800	103792	1330	35190
20	广西壮族自治区	3	0	1	2016	1	0	0	182.479	114.43	63.4769	7.25	3.5203	33.01	0.0122438	6.72	61.3608	0.492	5	46458.3	103.523	18317.6	2796.8	8273.66	7247.18	907000	25550	1152	38027
20	广西壮族自治区	3	0	1	2017	1	0	0	193.853	79.92	37.7312	21.64	2.8133	28.1	0.033394	7.42593	54.4003	0.506	5	47877.6	107.252	18523.3	2878.3	7450.85	8194.11	851119	26385	1099	38102
20	广西壮族自治区	3	0	1	2018	1	0	0	209.369	0.59	13.6982	0.7	2.8133	0.05	0.018084	6.36	34.9646	0.518	18	49534	120.919	20352.5	3019.37	8072.94	9260.2	794489	2337	1115	41489.2
20	广西壮族自治区	3	0	1	2019	1	0	0	226.592	35.89	30.289	1.77	3.8801	5.34	0.019018	6.39333	76.2992	0.53	13	51494.2	135.467	21237.1	3387.74	7077.43	10772	998405	2076	1228	42964
20	广西壮族自治区	3	0	1	2020	1	0	0	222.243	57.56	36.2024	4.26	4.19	17.6	0.00832514	6.39333	87.3449	0.542	19	53340.2	140.827	22156.7	3555.82	7108.49	11492.4	1007400	2184	1337	44308.9
20	广西壮族自治区	3	0	1	2021	1	0	0	239.255	76.31	45.2374	4.59	3.92937	10.63	0.0115693	6.89363	73.7336	0.551	6	55481.2	141.269	24740.9	4015.51	8187.9	12537.5	834964	2097	1308	49206
20	广西壮族自治区	3	0	1	2022	1	0	0	229.197	56.5821	38.0721	6.08986	4.15994	10.8215	0.0180763	6.78624	78.2312	0.569382	3	57246.5	142.726	26300.9	4269.8	8938.6	13092.5	908143	2169	1348	52164
21	海南省	1	0	1	2011	0	0	0	52.9703	1.02	47.9756	1.94	0.353	7.45	0.0374982	4.71	42.1738	0.498	2	4066.09	15.1916	2522.66	659.23	714.5	1148.93	239700	1512	190	28898
21	海南省	1	0	1	2012	0	0	0	54.2393	37.81	23.3788	3.38	0.4516	42.12	0.00743361	5.44	70.0775	0.502	3	4944.5	17.0619	2855.54	711.54	804.47	1339.53	212315	1898	179	32377
21	海南省	1	0	1	2013	0	0	0	51.9665	47.22	32.9032	9.65	0.435	17.8	0.0114894	5.67	38.244	0.513	1	5931.46	18.6746	3177.56	756.47	871.29	1518.7	231774	1665	183	35663
21	海南省	1	0	1	2014	0	0	0	58.8528	66.2	42.3787	10.32	0.4443	17.84	0.0374487	5.94	42.2478	0.519	7	7016.07	18.8632	3500.72	809.52	875.97	1815.23	232786	197	169	38923.7
21	海南省	1	0	1	2015	1	0	0	65.3546	12.54	22.6872	4.92	0.5713	12.76	0.0262718	6.22	130.168	0.531	10	7838.79	19.9362	3702.76	854.72	875.82	1972.22	315400	592	183	40818
21	海南省	1	0	1	2016	1	0	0	62.2555	38.65	56.8699	7.52	0.4457	65.15	0.0128929	6.52	697.539	0.544	5	8702.39	18.7411	4053.2	948.35	905.95	2198.9	373100	1238	287	44347
21	海南省	1	0	1	2017	1	0	0	60.7525	76.19	36.0302	22.41	0.5001	32.46	0.0410103	6.98111	847.416	0.553	21	9593.64	20.3278	4462.54	962.84	996.35	2503.35	357221	11372	299	48430
21	海南省	1	0	1	2018	1	0	0	63.8322	0.43	14.4629	0.64	0.5	1.11	0.0205305	5.31444	356.012	0.562	10	10062.3	21.4976	4832.05	1000.11	1095.79	2736.15	612419	125	269	51955.3
21	海南省	1	0	1	2019	1	0	0	66.0967	32.55	27.0784	1.77	0.6239	6.61	0.020454	5.34926	881.512	0.594	3	10295.7	20.8746	5308.93	1080.36	1099.03	3129.54	649827	145	269	56506.8
21	海南省	1	0	1	2020	1	0	0	64.2482	57.06	34.4118	2.35	0.83	4.05	0.0100902	5.34926	201.104	0.603	9	10578	18.7468	5532.39	1135.98	1055.26	3341.15	578400	168	290	55130.9
21	海南省	1	0	1	2021	1	0	0	68.4034	79.61	45.7642	4.65	0.71102	7.91	0.0121354	5.97486	720.054	0.59462	5	10968.5	20.9741	6475.2	1254.44	1238.8	3981.96	505462	185	209	63707
21	海南省	1	0	1	2022	1	0	0	60.9997	41.0047	34.9312	6.32613	0.745901	21.6776	0.0196494	5.78787	798.888	0.614225	3	11227.8	21.0514	6818.2	1417.8	1310.9	4089.5	507301	160	253	66602
22	重庆市	3	0	1	2011	0	1	0	150.708	0.85	43.0635	1.54	3.6342	1.01	0.0329794	6.28	385.099	0.545	7	16186.5	126.21	10011.4	844.52	5543.04	3623.81	1008100	36571	497	34500
22	重庆市	3	0	1	2012	0	1	0	149.358	36.33	24.0589	3.33	3.8602	34.13	0.00539214	6.89	220.261	0.567	3	18638.9	117.968	11409.6	940.01	5975.18	4494.41	1286852	45775	523	38914
22	重庆市	3	0	1	2013	0	1	0	134.28	45.63	31.7919	4.34	3.5598	19.34	0.0106724	7.17	251.512	0.584	7	21223	106.404	12783.3	1016.74	6397.92	5242.03	1145459	44722	522	43223
22	重庆市	3	0	1	2014	0	1	0	139.116	62.58	39.4772	10.75	3.9147	28.3	0.0398808	7.78	256.126	0.598	8	24019.7	108.592	14262.6	1061.03	6529.06	6672.51	1055083	970	523	47850
22	重庆市	3	0	1	2015	1	1	1	139.193	7.88	19.352	5.16	4.0267	17.58	0.0286498	7.82	244.803	0.615	3	27071.3	107.624	15717.3	1150.15	7069.37	7497.75	1407300	28587	612	52321
22	重庆市	3	0	1	2016	1	1	1	142.182	13.98	53.7142	7.63	4.0337	50.46	0.0167898	8.13	192.815	0.633	17	30618	110.976	17740.6	1303.24	7898.92	8538.43	1362000	25445	613	58502
22	重庆市	3	0	1	2017	1	1	1	127.775	73.01	36.9722	23.09	2.1412	37.9	0.029973	9.26778	149.414	0.65	9	33985.9	97.3123	19424.7	1276.09	8584.61	9564.03	1549499	37812	565	63442
22	重庆市	3	0	1	2018	1	1	1	123.804	58.69	53.3735	5.13	2.1414	4.94	0.00974228	7.90667	224.596	0.665	5	37112.8	90.8649	20363.2	1378.27	8328.79	10656.1	1601883	5083	579	65932.7
22	重庆市	3	0	1	2019	1	1	1	125.666	23.37	25.6996	1.78	2.8696	8.96	0.0191858	7.97889	162.732	0.682	6	39936.1	90.5744	23605.8	1551.42	9496.84	12557.5	1729521	3073	594	75828
22	重庆市	3	0	1	2020	1	1	1	87.8285	15.67	32.7166	2.67	2.71	10.97	0.0083269	7.97889	139.296	0.695	12	42557.8	53.3245	25002.8	1803.33	9992.21	13207.2	1797100	3931	609	78170.4
22	重庆市	3	0	1	2021	1	1	1	122.332	82.94	48.5747	4.72	2.36723	22.01	0.0129915	8.76585	118.611	0.703	6	45296.8	80.5672	27894	1922.03	11184.9	14787	1637451	6477	649	86879
22	重庆市	3	0	1	2022	1	1	1	125.013	39.6045	37.3434	6.38969	2.09048	21.5629	0.0179995	8.80004	120.305	0.726909	2	47634.2	85.9609	29129	2012.1	11693.9	15423.1	1759820	6686	782	90663
23	四川省	3	0	1	2011	0	0	0	280.376	141.21	63.3679	10.27	5.5326	24.34	0.0093911	5.86	626.719	0.418	9	30770.7	201.339	21026.7	2983.51	11029.1	7014.04	1158000	25967	1092	26133
23	四川省	3	0	1	2012	0	0	0	289.712	35.24	22.3525	3.77	7.3309	25.44	0.00558479	6.1	612.562	0.435	18	35456.6	211.364	23872.8	3297.21	12333.3	8242.31	1359422	20971	1535	29608
23	四川省	3	0	1	2013	0	0	0	277.508	21.86	26.0606	4.75	5.4842	17.38	0.0106261	6.26	624.265	0.449	10	40250.8	203.835	26392.1	3425.61	13579	9256.13	1599491	21528	1516	32617
23	四川省	3	0	1	2014	0	0	0	298.402	59.34	41.4312	11.23	4.9261	57.66	0.0405596	6.62	622.402	0.463	11	45076.4	201.569	28536.7	3531.05	13962.4	11043.2	1686939	5633	1524	35128
23	四川省	3	0	1	2015	1	0	0	253.584	6.51	20.5021	4.45	5.6138	12.04	0.0298024	6.54	648.745	0.477	4	49857.8	153.391	30053.1	3677.3	13248.1	13127.7	1693100	20015	1512	36775
23	四川省	3	0	1	2016	1	0	0	250.139	12.27	49.5148	8.55	6.5411	33.83	0.0168884	6.66	551.202	0.493	6	55070.6	148.1	32934.5	3929.33	13448.9	15556.3	1663500	25276	1658	40003
23	四川省	3	0	1	2017	1	0	0	229.761	67.83	31.9557	10.7	4.8552	34.71	0.0443997	7.42148	535.499	0.509	21	60133.8	125.494	36980.2	4262.35	14328.1	18389.7	1977468	11607	1751	44651.3
23	四川省	3	0	1	2018	1	0	0	255.305	56.48	51.4061	5.22	4.8545	3.82	0.00979559	6.98667	619.395	0.524	6	65038.6	148.804	40678.1	4426.66	15322.7	20928.8	2269045	9743	1781	48883.2
23	四川省	3	0	1	2019	1	0	0	276.557	17.74	22.2237	1.75	6.0596	15.49	0.0197212	6.97889	211.338	0.539	3	70197.8	151.405	46615.8	4807.24	17365.3	24443.2	2670062	7601	1869	55774
23	四川省	3	0	1	2020	1	0	0	266.684	13.13	30.217	2.21	5.86	7.5	0.00781678	6.97889	162.592	0.567	8	74743.9	141.437	48598.8	5556.58	17571.1	25471.1	2640200	7445	2011	58125.5
23	四川省	3	0	1	2021	1	0	0	268.881	85.3	48.0293	4.68	5.42625	31.7	0.0121584	7.38659	275.862	0.578	15	79475.1	140.27	53850.8	5661.86	19901.4	28287.5	2185494	6285	2045	64326
23	四川省	3	0	1	2022	1	0	0	260.551	44.7826	36.4299	6.06716	5.26825	22.6515	0.0206557	7.47683	205.683	0.5912	10	84194.6	139.114	56749.8	5964.3	21157.1	29628.4	2375849	3913	2189	67777
24	贵州省	3	0	1	2011	0	0	0	268.691	134.12	59.1944	10.71	5.1209	23.63	0.0109669	3.63	34.0686	0.35	2	9774.95	252.903	5701.84	726.22	2194.33	2781.29	554500	4880	497	16413
24	贵州省	3	0	1	2012	0	0	0	287.213	27.39	21.0503	5	5.4499	15.44	0.00614403	4.36	30.6975	0.363	1	11656.5	267.082	6852.2	891.91	2677.54	3282.75	657310	6357	523	19710
24	贵州省	3	0	1	2013	0	0	0	314.246	18.37	28.1529	4.98	4.3641	9.12	0.0101074	4.52	35.0075	0.379	3	14078.7	289.403	8086.86	1029.05	3243.7	3734.04	664429	77	522	23151
24	贵州省	3	0	1	2014	0	0	0	319.612	57.4	44.2496	11.54	3.6926	67.6	0.0403117	4.85	28.1718	0.402	2	16755.2	290.045	9266.39	1280.45	3857.44	4128.5	853406	62	523	26437
24	贵州省	3	0	1	2015	1	0	0	327.57	58.41	44.7022	8.6	4.3898	6.62	0.00841158	4.57	27.2197	0.43	2	19919.6	296.109	10502.6	1640.61	4147.83	4714.12	964900	87	612	29847.2
24	贵州省	3	0	1	2016	1	0	0	348.356	10.44	50.3829	9.36	4.9461	42.48	0.0207667	4.65	66.8466	0.456	10	23586.8	313.315	11776.7	1846.19	4669.53	5261.01	1270900	55	613	33246
24	贵州省	3	0	1	2017	1	0	0	340.339	25.56	29.4555	11.51	4.5741	26.48	0.0552555	5.90074	54.4922	0.478	15	27283.5	303.483	13540.8	2032.27	5428.14	6080.42	1253936	141	565	37956.1
24	贵州省	3	0	1	2018	1	0	0	291.449	54.77	47.3442	5.34	4.5742	7.89	0.0126222	4.69889	42.0439	0.495	14	31207.9	252.729	14806.5	2159.54	5755.54	6891.37	1343812	2711	579	41243.6
24	贵州省	3	0	1	2019	1	0	0	289.236	14.31	24.1579	1.79	6.3484	9.78	0.0158034	4.75852	46.7063	0.515	5	34607.6	249.797	16769.3	2280.56	6058.45	8430.33	1885300	1968	594	46433
24	贵州省	3	0	1	2020	1	0	0	277.823	12.55	31.5547	2.25	5.94	6.72	0.00682293	4.75852	29.1103	0.532	3	37674.6	238.047	17826.6	2539.88	6211.62	9075.07	1461500	2250	609	46266.7
24	贵州省	3	0	1	2021	1	0	0	295.439	77.83	44.9587	2.66	5.5371	15.83	0.0109439	5.23877	46.81	0.543	22	40186.1	257.966	19586.4	2730.92	6984.7	9870.8	1587386	2021	649	50808
24	贵州省	3	0	1	2022	1	0	0	272.662	63.6057	43.1273	7.36018	5.82417	5.30329	0.0185052	5.18916	48.328	0.573891	9	41984.4	242.358	20164.6	2861.2	7113	10190.4	1179962	2783	782	52321
25	云南省	3	0	1	2011	0	0	0	187.807	128.47	66.3848	11.07	3.6399	51.18	0.0112845	5.18	114.882	0.366	5	16518.3	167.169	8893.12	1411.01	3780.32	3701.79	958600	4707	789	19265
25	云南省	3	0	1	2012	0	0	0	195.468	22.48	23.6375	3.01	3.5773	33.09	0.00673375	4.49	157.188	0.385	7	20307.8	171.961	10309.5	1654.55	4419.2	4235.72	1011156	31349	801	22195
25	云南省	3	0	1	2013	0	0	0	195.781	14.61	22.4861	5.1	3.4721	7.31	0.00845136	4.57	152.661	0.4	5	24569.8	168.985	11832.3	1895.34	4927.82	4897.75	1052946	9940	823	25322
25	云南省	3	0	1	2014	0	0	0	187.77	53.78	38.6409	3.97	1.8913	58.6	0.0377356	4.94	163.713	0.412	8	29409.6	158.464	12814.6	1990.07	5281.82	5542.7	1088821	587	858	27263.6
25	云南省	3	0	1	2015	1	0	0	178.651	56.77	43.4397	8.88	2.1846	3.95	0.00910727	4.86	194.181	0.429	0	34595.8	149.502	13619.2	2055.78	5416.12	6147.27	1340800	8842	921	28806
25	云南省	3	0	1	2016	1	0	0	184.537	6.68	43.2121	10.36	2.0286	14.45	0.0245144	4.89	59.9097	0.446	2	40068.2	150.369	14788.4	2195.11	5690.16	6903.15	1501300	12084	929	31093
25	云南省	3	0	1	2017	1	0	0	198.217	18.73	31.4036	12.24	2.1337	42.03	0.0547893	5.12111	63.6543	0.463	1	45505.4	150.858	16376.3	2338.37	6204.97	7833	1794849	8998	1014	34221
25	云南省	3	0	1	2018	1	0	0	205.482	52.69	45.0181	5.5	2.1339	5	0.0115497	4.52556	72.9696	0.474	5	50974.5	136.246	17881.1	2498.86	6957.44	8424.82	1698051	4674	1055	37136.3
25	云南省	3	0	1	2019	1	0	0	172.113	69.12	29.7086	5.65	4.9586	13.73	0.00966002	4.55741	49.7424	0.487	4	56477.9	135.036	23223.8	3037.62	7961.58	12224.5	2051577	2118	1094	47944
25	云南省	3	0	1	2020	1	0	0	205.716	11.29	27.1221	3.34	5.88	4.88	0.00743689	4.55741	50.3217	0.5	10	61817	132.907	24521.9	3598.91	8287.54	12635.5	1639700	2216	1153	51975.2
25	云南省	3	0	1	2021	1	0	0	203.994	41.24	47.5276	2.55	3.98034	14.64	0.0108693	4.6098	35.7202	0.51	8	67008.2	136.716	27146.8	3870.17	9589.37	13687.2	1361013	3315	1181	57686
25	云南省	3	0	1	2022	1	0	0	198.069	36.3581	36.1838	6.30201	4.41645	19.2443	0.0179199	4.65562	8.69532	0.530127	11	72325.3	135.582	28954.2	4012.2	10471.2	14470.8	1469509	2434	1202	61716
26	陕西省	3	0	1	2011	0	0	0	344.519	118.99	67.0138	11.43	5.4654	89	0.010972	4.37	155.654	0.474	6	21413.8	252.143	12512.3	1220.9	6935.59	4355.81	961300	8130	1044	33464
26	陕西省	3	0	1	2012	0	0	0	405.131	112.62	45.2999	10.01	6.0185	11.6	0.0223255	5.18	183.506	0.497	21	25444.4	302.588	14453.7	1370.16	8073.87	5009.65	941427	9606	1131	38564
26	陕西省	3	0	1	2013	0	0	0	482.836	13.49	23.225	5.27	6.2066	3.19	0.00841299	5.71	223.255	0.516	9	29603.9	372.028	16205.5	1526.05	8911.64	5607.52	1097656	19546	1236	43117
26	陕西省	3	0	1	2014	0	0	0	502.04	13.33	34.0274	4.1	5.8927	60.19	0.0385761	6.36	252.622	0.53	11	33872.2	386.894	17689.9	1564.94	9577.24	6547.76	1125076	7969	1031	46929
26	陕西省	3	0	1	2015	1	0	0	529.363	55.77	40.8546	9.11	5.7244	15.52	0.0133481	6.33	299.915	0.547	13	37686	417.972	18021.9	1597.63	9082.13	7342.1	1507700	27543	1068	47626
26	陕西省	3	0	1	2016	1	0	0	590.052	6	38.436	9.11	5.453	7.5	0.0336508	6.69	346.314	0.564	16	41684.8	490.025	19399.6	1693.85	9490.72	8215.02	1267900	28118	1136	51015
26	陕西省	3	0	1	2017	1	0	0	637.835	15.1	28.4717	12	3.2931	27.35	0.0657825	8.28037	389.618	0.581	12	45792.8	534.948	21898.8	1741.45	10882.9	9274.48	1625188	24203	1183	57266.3
26	陕西省	3	0	1	2018	1	0	0	576.346	49.58	41.1018	2.52	3.2932	5.99	0.0120438	6.37889	473.193	0.597	10	49862.1	474.699	24438.3	1830.19	12157.5	10450.6	1760158	18629	1212	63477.5
26	陕西省	3	0	1	2019	1	0	0	611.595	67.22	28.8633	5.8	4.7727	19.73	0.00914364	6.43519	531.788	0.613	1	53476.5	504.829	25793.2	1990.93	11980.8	11821.5	2454839	1368	1309	66649
26	陕西省	3	0	1	2020	1	0	0	620.188	8.58	27.2509	3.44	4.14	3.38	0.00770284	6.43519	559.771	0.627	2	56836.6	515.685	26181.9	2267.54	11362.6	12551.7	1903400	1476	1355	66291.6
26	陕西省	3	0	1	2021	1	0	0	571.866	33.69	40.8197	2.39	3.58308	13.48	0.00923264	7.44491	600.967	0.636	3	59419.5	464.492	29801	2409.39	13802.5	13589.1	1762496	1621	1336	75360
26	陕西省	3	0	1	2022	1	0	0	601.454	23.8127	33.0332	6.28209	3.12311	15.8139	0.0241059	7.44357	655.152	0.659582	6	62237.3	487.449	32772.7	2575.3	15933.1	14264.2	2320137	2223	1427	82864
27	甘肃省	3	0	1	2011	0	0	0	169.694	110.84	57.9271	5.46	2.3296	54.16	0.00807856	3.48	4.64286	0.372	7	8126.96	108.86	5020.37	678.75	2377.83	1963.79	849900	5256	852	19595
27	甘肃省	3	0	1	2012	0	0	0	173.754	105.87	42.2231	10.33	2.3283	11.94	0.0222091	3.38	3.81875	0.388	11	9413.36	113.088	5650.2	780.5	2600.09	2269.61	720006	5925	873	21978
27	甘肃省	3	0	1	2013	0	0	0	181.466	14.32	21.5754	5.46	1.9657	4.08	0.00788709	3.63	4.3273	0.405	2	10910.8	116.338	6330.69	879.37	2821.04	2567.6	698222	3329	933	24538.9
27	甘肃省	3	0	1	2014	0	0	0	180.469	11.18	33.3653	4.69	2.311	36.9	0.0403032	4.04	6.06936	0.423	11	12565.4	116.815	6836.82	900.76	2926.45	3009.61	732115	3568	913	26432.9
27	甘肃省	3	0	1	2015	1	0	0	176.575	53.44	42.4098	9.34	2.7389	12.3	0.015034	4.42	7.16236	0.442	3	14315.2	113.648	6790.32	954.09	2494.77	3341.46	953500	2985	941	26165.3
27	甘肃省	3	0	1	2016	1	0	0	169.717	66.56	60.4693	12.04	2.2305	9.29	0.0137461	4.97	8.00731	0.461	7	16260.3	109.161	7200.37	983.39	2515.56	3701.42	952500	2649	985	27643
27	甘肃省	3	0	1	2017	1	0	0	173.987	12.04	27.0853	9.3	1.4236	31.7	0.0675687	4.80185	2.87932	0.481	13	16889.9	112.041	7459.9	859.752	2561.79	4038.36	1021976	4508	1016	28496.5
27	甘肃省	3	0	1	2018	1	0	0	182.496	12.93	38.7551	2.68	1.4236	3.71	0.0128992	4.44667	3.48333	0.497	7	17254.6	120.567	8246.07	921.305	2794.67	4530.1	1278221	1778	1040	31336.1
27	甘肃省	3	0	1	2019	1	0	0	185.441	66.31	28.8093	5.86	2.1499	23.89	0.0103967	4.42889	5.64504	0.507	1	17665.6	120.735	8718.3	1050.48	2862.42	4805.4	1065160	1528	1065	32994.6
27	甘肃省	3	0	1	2020	1	0	0	195.987	8.47	27.3921	2.6	2.26	5.38	0.0086681	4.42889	5.88413	0.522	1	18162.6	129.534	9016.7	1198.14	2852.03	4966.52	1140300	1808	1080	35994.8
27	甘肃省	3	0	1	2021	1	0	0	211.517	27.51	46.132	2.31	1.85757	14.86	0.00842837	4.96267	5.55899	0.533	6	18851	144.798	10243.3	1364.72	3466.56	5412.02	820990	1988	1133	41046
27	甘肃省	3	0	1	2022	1	0	0	211.472	1.26608	29.6089	5.58191	1.81108	11.9212	0.0252212	5.07398	5.55936	0.5574	6	19679.5	157.765	11201.6	1515.3	3945	5741.2	1132117	761	1201	44968
28	青海省	3	0	1	2011	0	0	0	50.1009	55.18	53.75	5.51	0.676	24.85	0.0120968	2.54	11.1663	0.462	2	3629.82	36.3472	1670.44	155.08	975.18	540.18	417600	691	135	29522
28	青海省	3	0	1	2012	0	0	0	58.5597	102.7	42.1013	10.75	0.6947	27.69	0.0228933	2.64	12.8613	0.476	4	4504.77	43.9691	1893.54	176.91	1092.34	624.29	439919	1134	196	33181
28	青海省	3	0	1	2013	0	0	0	70.8347	11.03	21.3996	4.84	0.7347	13.11	0.00852446	2.84	5.6888	0.491	8	5610.68	54.484	2122.06	207.59	1204.31	689.15	667797	1515	141	36875
28	青海省	3	0	1	2014	0	0	0	62.5314	8.69	28.8093	5.31	0.7463	35.31	0.0439951	2.53	3.03105	0.504	5	6932.01	46.1715	2303.32	215.93	1234.31	853.08	567286	181	140	39671
28	青海省	3	0	1	2015	1	0	0	44.0512	52.81	35.6282	3.46	0.8885	14.78	0.0169494	2.78	3.5695	0.513	5	8377.73	27.398	2417.05	208.93	1207.31	1000.81	873600	1681	138	41252
28	青海省	3	0	1	2016	1	0	0	53.1516	62.24	54.6952	12.49	0.808	14.9	0.0144673	2.93	1.03304	0.526	1	9840.28	34.7057	2572.49	221.19	1249.98	1101.32	734100	1832	152	43531
28	青海省	3	0	1	2017	1	0	0	48.6831	11.69	21.4546	9.97	0.619	23.55	0.05483	2.37185	1.21161	0.542	9	11237.2	32.0675	2624.83	238.41	1162.41	1224.01	609256	2469	148	44047
28	青海省	3	0	1	2018	1	0	0	49.0552	12.24	34.7262	2.34	0.619	6.07	0.0136771	3.17	0.308186	0.56	8	12552.1	31.7808	2865.23	268.1	1247.06	1350.07	635099	1394	162	47689.5
28	青海省	3	0	1	2019	1	0	0	45.2802	63.67	29.256	5.93	0.844	24.4	0.00972191	3.18333	4.65914	0.572	0	13785.1	27.7377	2965.95	301.9	1159.75	1504.3	693826	281	169	48981.5
28	青海省	3	0	1	2020	1	0	0	41.3184	15.66	13.1411	0.98	0.82	2.79	0.00388643	3.18333	1.69198	0.6	0	14506.6	24.3201	3005.92	334.3	1143.55	1528.07	735100	566	192	50818.6
28	青海省	3	0	1	2021	1	0	0	45.9873	23.86	41.0946	2.31	0.78836	14.96	0.00767829	3.18081	3.63894	0.61	4	15056.5	29.1406	3346.63	352.652	1332.61	1661.37	721726	259	203	56398
28	青海省	3	0	1	2022	1	0	0	45.5567	39.7332	34.5864	5.85507	0.787291	15.0805	0.0193535	3.25257	2.77954	0.620727	2	15337.2	30.2352	3610.1	380.2	1585.7	1644.2	853604	544	204	60724
29	宁夏回族自治区	3	0	1	2011	0	0	0	190.948	43.31	49.3437	5.58	1.7796	34.27	0.0104053	3.99	13.3515	0.502	2	4804.7	179.871	2102.21	184.14	1056.15	861.92	352300	5044	212	33043
29	宁夏回族自治区	3	0	1	2012	0	0	0	188.57	99.46	48.1386	11.11	1.6933	38.2	0.0214182	4.37	13.6375	0.511	3	5631.26	167.372	2341.29	199.4	1159.37	982.52	353727	7698	215	36394
29	宁夏回族自治区	3	0	1	2013	0	0	0	187.756	24.01	47.4986	4.46	2.5933	6.36	0.0558127	4.5	8.9921	0.528	5	6546.24	163.73	2577.57	222.98	1264.96	1077.12	329285	9400	215	39613
29	宁夏回族自治区	3	0	1	2014	0	0	0	195.216	7.78	28.1061	5.73	2.015	34.07	0.0513338	5.26	5.59262	0.548	1	7871.68	172.255	2752.1	216.99	1341.24	1193.87	345962	234	240	41834
29	宁夏回族自治区	3	0	1	2015	1	0	0	193.378	45.81	34.4864	3.41	2.2395	10.45	0.0180015	4.91	12.0967	0.57	4	9475.33	169.393	2911.77	237.76	1379.6	1294.41	454900	5793	280	43805
29	宁夏回族自治区	3	0	1	2016	1	0	0	189.717	59.94	57.781	12.89	2.8054	25.17	0.0176613	5.05	17.5514	0.587	5	11082.3	161.255	3168.59	241.6	1488.44	1438.55	366900	3907	325	47194
29	宁夏回族自治区	3	0	1	2017	1	0	0	226.238	9.79	22.2274	8.67	1.2226	38.06	0.0538589	6.66148	20.5835	0.61	13	12418	196.945	3443.56	250.62	1580.57	1612.37	576074	4300	366	50765
29	宁夏回族自治区	3	0	1	2018	1	0	0	235.935	9.17	31.496	2.49	1.2229	4.91	0.0151045	5.05667	14.8171	0.622	8	13072.6	211.253	3705.18	279.85	1650.26	1775.07	723808	3435	366	54094.2
29	宁夏回族自治区	3	0	1	2019	1	0	0	251.899	58.37	26.1231	2.07	1.6434	21.59	0.0103038	5.09222	17.2846	0.636	1	13412.4	224.613	3748.48	279.93	1584.72	1883.83	540388	110	335	54217
29	宁夏回族自治区	3	0	1	2020	1	0	0	259.513	15.39	11.2964	0.97	1.57	2.19	0.00619568	5.09222	18.0614	0.649	3	13758.6	233.092	3920.55	338.01	1608.96	1973.58	494800	297	346	54527.8
29	宁夏回族自治区	3	0	1	2021	1	0	0	283.517	14.48	42.2451	2.2	1.5152	6.47	0.00745505	5.73504	19.1126	0.66	3	14081.2	255.347	4522.31	364.477	2021.55	2136.28	477084	258	344	62549
29	宁夏回族自治区	3	0	1	2022	1	0	0	300.756	6.53303	29.1519	4.27213	1.34351	4.42242	0.0311131	5.76088	20.8534	0.685036	5	14509.8	273.712	5069.6	407.5	2449.1	2213	582049	2929	496	69781
30	新疆维吾尔自治区	3	0	1	2011	0	0	0	286.311	34.32	43.3714	6.05	4.6912	98.75	0.00997184	2.95	22.1435	0.437	0	11958.2	178.868	6610.05	1139.03	3225.9	2245.12	536700	5405	859	30087
30	新疆维吾尔自治区	3	0	1	2012	0	0	0	333.441	96.88	46.6871	5.61	6.4443	19	0.0153784	2.94	25.5	0.442	3	14311.7	220.628	7505.31	1320.57	3481.56	2703.18	641211	7738	900	33796
30	新疆维吾尔自治区	3	0	1	2013	0	0	0	336.337	22.82	46.975	4.58	6.7433	11.59	0.0586585	2.98	29.1979	0.449	3	17364.8	213.683	8443.84	1468.29	3765.97	3125.98	689919	6876	1008	37552.5
30	新疆维吾尔自治区	3	0	1	2014	0	0	0	366.26	5.15	23.0133	6.29	4.9166	50.51	0.046829	3.49	25.2285	0.468	2	20970.5	230.382	9273.46	1538.6	3948.96	3785.9	708598	50	1020	40648
30	新疆维吾尔自治区	3	0	1	2015	1	0	0	379.092	31.72	36.5867	3.43	5.9969	10.64	0.0234934	3	29.3672	0.488	2	24583	257.563	9324.8	1559.08	3596.4	4169.32	715100	2200	1007	40036
30	新疆维吾尔自治区	3	0	1	2016	1	0	0	410.853	58.38	51.6658	13.12	6.1756	26.3	0.0272507	2.95	27.6925	0.504	5	27737.5	295.053	9649.7	1648.97	3647.01	4353.72	650700	4675	1076	40564
30	新疆维吾尔自治区	3	0	1	2017	1	0	0	452.265	52.1	45.1003	7.93	3.3075	8.62	0.011099	4.22444	12.9642	0.519	6	31680.4	334.375	10882	1551.84	4330.89	4999.23	546583	3732	1063	44941
30	新疆维吾尔自治区	3	0	1	2018	1	0	0	480.946	7.5	32.3391	2.83	3.3071	3.75	0.0163445	4.05	14.1835	0.54	0	33245.2	371.549	12199.1	1692.09	4922.97	5584.02	943276	1506	1053	49474.7
30	新疆维吾尔自治区	3	0	1	2019	1	0	0	519.305	45.17	24.8888	1.9	4.6301	12.72	0.00933678	4.01667	22.7728	0.555	1	34623.7	410.749	13597.1	1781.75	4795.5	7019.86	878639	1486	1065	54280
30	新疆维吾尔自治区	3	0	1	2020	1	0	0	555.467	15.67	13.7362	0.98	4.38	3.05	0.00683116	4.01667	14.3433	0.565	5	36578.5	446.599	13797.6	1981.28	4744.45	7071.85	825900	1958	1155	53593.2
30	新疆维吾尔自治区	3	0	1	2021	1	0	0	632.035	13.33	39.0292	2.02	3.81493	11.09	0.00797104	4.28311	15.5783	0.572	3	39103.1	516.89	15983.6	2356.06	5967.36	7660.23	934783	908	1079	61725
30	新疆维吾尔自治区	3	0	1	2022	1	0	0	682.655	12.6525	31.343	3.96939	3.21905	0.897087	0.0254378	4.47517	12.8216	0.594091	7	41723.3	570.341	17741.3	2509.3	7271.1	7961	1249870	805	1125	68552
